# Supplementary material
Source: publisher site journal article supplement (https://www.dovepress.com/article/566227)
Supplement: Supplementary file 1 [file Supplementary Figures_1.pdf › Supplementary Figures_1.pdf]

|           |                       |                      | Step1  |                |        |                | Step2              | Step3                      | Step4                       | Step5       | Step6              |     |
|-----------|-----------------------|----------------------|--------|----------------|--------|----------------|--------------------|----------------------------|-----------------------------|-------------|--------------------|-----|
|           | Biological Replicates | Technical Replicates | Cq-Tar | Average Cq-Tar | Cq-Ref | Average Cq-Ref | $\Delta$ CqTar-Ref | Average $\Delta$ CqTar-Ref | $\Delta \Delta$ Cq(Tre-Ave) | Expression  | Average Expression | STD |
| Control   | 1                     | I                    | 30.382 | 30.349439      | 19.857 | 19.90928141    | 10.440158          | 9.954563565                | 0.48559401                  | 0.714202947 |                    |     |
|           |                       | II                   | 30.270 |                | 19.964 |                |                    |                            |                             |             |                    |     |
|           |                       | III                  | 30.396 |                | 19.907 |                |                    |                            |                             |             |                    |     |
|           | 2                     | I                    | 29.853 | 29.748592      | 19.924 | 20.02661514    | 9.7219766          |                            | -0.232587                   | 1.174939903 |                    |     |
|           |                       | II                   | 29.780 |                | 20.068 |                |                    |                            |                             |             |                    |     |
|           |                       | III                  | 29.612 |                | 20.088 |                |                    |                            |                             |             |                    |     |
|           | 3                     | I                    | 29.008 | 28.888577      | 19.071 | 19.18702062    | 9.7015565          |                            | -0.253007                   | 1.191688391 |                    |     |
|           |                       | II                   | 28.948 |                | 19.313 |                |                    |                            |                             |             |                    |     |
|           |                       | III                  | 28.710 |                | 19.176 |                |                    |                            |                             |             |                    |     |
|           | 4                     | I                    |        | #DIV/0!        |        | #DIV/0!        | #DIV/0!            |                            | #DIV/0!                     | #DIV/0!     |                    |     |
|           |                       | II                   |        |                |        |                |                    |                            |                             |             |                    |     |
|           |                       | III                  |        |                |        |                |                    |                            |                             |             |                    |     |
| Treatment | 1                     | I                    | 30.412 | 30.413366      | 21.428 | 21.52739461    | 8.8859717          | NA                         | -1.0685919                  | 2.097385218 |                    |     |
|           |                       | II                   | 30.251 |                | 21.569 |                |                    |                            |                             |             |                    |     |
|           |                       | III                  | 30.577 |                | 21.585 |                |                    |                            |                             |             |                    |     |
|           | 2                     | I                    | 28.457 | 28.49085       | 19.769 | 19.73717626    | 8.7536742          |                            | -1.2008894                  | 2.298813418 |                    |     |
|           |                       | II                   | 28.575 |                | 19.714 |                |                    |                            |                             |             |                    |     |
|           |                       | III                  | 28.441 |                | 19.728 |                |                    |                            |                             |             |                    |     |
|           | 3                     | I                    | 30.282 | 30.453686      | 21.663 | 21.81633631    | 8.6373501          |                            | -1.3172135                  | 2.491843534 |                    |     |
|           |                       | II                   | 30.407 |                | 21.958 |                |                    |                            |                             |             |                    |     |
|           |                       | III                  | 30.672 |                | 21.829 |                |                    |                            |                             |             |                    |     |
|           | 4                     | I                    |        | #DIV/0!        |        | #DIV/0!        | #DIV/0!            |                            | #DIV/0!                     | #DIV/0!     |                    |     |
|           |                       | II                   |        |                |        |                |                    |                            |                             |             |                    |     |
|           |                       | III                  |        |                |        |                |                    |                            |                             |             |                    |     |

Supplementary Figure 1. The mRNA expression of CD84 in brain tissue samples.

Supplementary Figure 1. The mRNA expression of CD84 in brain tissue samples.

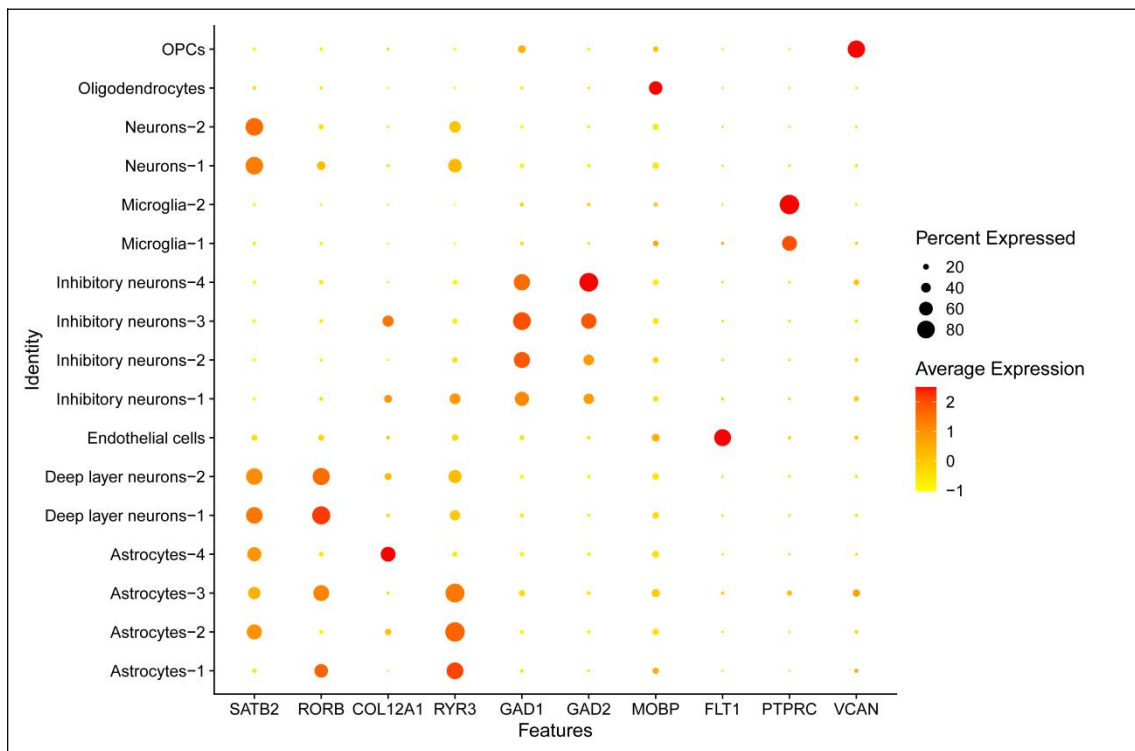

Supplementary Figure 2. Cell type identification in the GSE268807 single-cell dataset.

Unsupervised clustering revealed major neural cell types defined by canonical markers: oligodendrocytes (MOBP), astrocytes (RYR3, COL12A1), microglia (PTPRC), OPCs (VCAN), and neuronal populations (SATB2, RORB) and inhibitory neurons (GAD1, GAD2).
